1 **The *Drosophila* Eukaryotic Initiation Factor eIF6 affects development by**  
2 **regulating apoptosis via the ecdysone pathway**

3 Arianna Russo<sup>1,2</sup>, Guido Gatti<sup>1,3</sup>, Roberta Alfieri<sup>1</sup>, Elisa Pesce<sup>1</sup>, Kelly Soanes<sup>4</sup>, Sara  
4 Ricciardi<sup>1,3</sup>, Cristina Cheroni<sup>1</sup>, Thomas Vaccari<sup>3</sup>, Stefano Biffo<sup>1,3\*</sup>, Piera Calamita<sup>1,3\*</sup>

5

6

7 <sup>1</sup> [INGM](#), National Institute of Molecular Genetics, "Romeo ed Enrica Invernizzi", Milan, Italy

8 <sup>2</sup> DiSIT, University of Eastern Piedmont, Alessandria, Italy

9 <sup>3</sup> DBS, Università [degli Studi di Milano](#)

10 <sup>4</sup> Aquatic and Crop Resource Development - National Research Council of Canada

11

12 \*These authors contributed equally to this work

13 Address correspondence to Piera Calamita or Stefano Biffo Via Francesco Sforza 35 20122 Milano

14 Italia. [calamita@ingm.org](mailto:calamita@ingm.org); [biffo@ingm.org](mailto:biffo@ingm.org)

15

16 *Running Title: DeIF6 regulates PCD via 20-HE*

17

18 **ABSTRACT**

19 Translation factors downregulation modulates gene expression but the effect of their  
20 overexpression is still unknown. The Eukaryotic Initiation Factor 6 (eIF6) is  
21 necessary for ribosome biogenesis and translation initiation. The *eif6* gene is a  
22 single genetic locus highly conserved from yeast to humans indicating a tight  
23 regulation of its gene dosage. eIF6 haploinsufficiency protects mice from  
24 lymphomagenesis, and eIF6 is upregulated or amplified in some cancers, but a  
25 mechanistic study on the effects of eIF6 overexpression is still lacking. Taking  
26 advantage of genetic tractability of *D. melanogaster*, we characterized the first *in vivo*

27 model of eIF6 upregulation. *Drosophila* eIF6 overexpression increases translation  
28 and results in a *rough* eye phenotype due to aberrant apoptosis. Mechanistically,  
29 eIF6 reshapes transcription and histone acetylation, disrupting the ecdysone network.  
30 This work is the first evidence of how increased translation generates a full  
31 transcriptional and hormonal dysregulation, providing new perspectives on the  
32 physiological relevance of the translational machinery in regulating gene expression  
33 and a model to screen drugs potentially useful to treat cells with altered *eif6* gene  
34 dosage.

35

## 36 INTRODUCTION

37 Ribosomal proteins (RPs) and Eukaryotic Initiation Factors (eIFs) are necessary for  
38 the control of two major cellular processes: ribosome biogenesis and translational  
39 control <sup>1, 2, 3, 4, 5</sup>. Recently, it has become evident that the alteration of gene dosage in  
40 either one of these two classes of factors is causative of many pathologies, and it  
41 has been widely established that their downregulation can protect from cancer <sup>6</sup>.

42 Interestingly, proteins involved in ribosome biogenesis do not usually have a role in  
43 the translational control and *vice versa* <sup>7</sup>. Conversely, the Eukaryotic Initiation Factor  
44 6 (eIF6) is involved in both processes <sup>8</sup>. Around 20% of eIF6 is essential for  
45 nucleolar maturation of the large subunit of the ribosome, the 60s <sup>9</sup>. Moreover, by  
46 binding the 60S itself, eIF6 has an anti-association activity, preventing the premature  
47 joining of 60S with a 40S not loaded with a mRNA. The release of eIF6 is then  
48 required for the formation of an active 80S <sup>10</sup>. In mammals, eIF6 acts as a translation  
49 factor necessary for fatty acid synthesis and glycolysis through translational  
50 regulation of G/C rich or uORF containing mRNAs, such as CEBP/ $\beta$ , ATF4 and  
51 CEBP/ $\delta$  <sup>11, 12</sup>.

52 Strikingly, high levels of eIF6 or hyperphosphorylated eIF6 are observed in some  
53 cancers <sup>13, 14</sup>, and are rate limiting for tumour onset and progression in mice <sup>15</sup>. In  
54 addition, eIF6 amplification is observed in luminal breast cancer patients <sup>16</sup>. However,  
55 whether eIF6 overexpression *per se* can change a transcriptional program in the  
56 absence of other genetic lesions is still unknown.

57 eIF6 is highly conserved in yeast, *Drosophila* and humans <sup>17</sup>. Despite ubiquitous  
58 expression, eIF6 levels *in vivo* are tightly regulated in physiological conditions,  
59 showing considerable variability of expression among different tissues <sup>18</sup>. During  
60 evolution, the *eif6* gene has not been subjected to gene duplication. These

61 observations, together with its regulatory role in ribosome biogenesis, translation,  
62 and metabolism, suggest a conserved need for strict regulation of *eif6* gene dosage.  
63 Importantly, these observations suggest that it might be difficult to generate *in vivo*  
64 models with altered eIF6 expression levels <sup>19</sup>.

65 Taking advantage of the high sequence similarity among *eif6* homologues, we  
66 focused our study on the effects of eIF6 overexpression, using *Drosophila*  
67 *melanogaster*, an ideal model to manipulate gene expression in a time- and tissue-  
68 dependent manner using the GAL4/UAS system <sup>20, 21</sup>. Such *in vivo* gain of function  
69 approach allowed us to investigate how gene dosage alteration influenced the health  
70 of an organ developing within an intact organism.

71 Here, we used as a model organ the fly eye, whose development from epithelial  
72 primordia, the larval eye imaginal disc, is well understood. The adult fly compound  
73 eye is a stunningly beautiful structure of approximately 800 identical units, called  
74 ommatidia <sup>22</sup>. Each ommatidium is composed of eight neuronal photoreceptors, four  
75 glial-like cone cells and pigment cells. The study of such simple structure with the  
76 powerful genetic tools available in *Drosophila* has majorly improved our  
77 understanding of the basis of cell differentiation, apoptosis and cell-cell interactions  
78 <sup>23, 24</sup>. By characterizing DelF6 overexpression we have found alterations in the  
79 formation of the adult eye, which are dependent on aberrant apoptosis during the  
80 pupal developmental stage. Interestingly, such defects correlated with an increase in  
81 general translation. Importantly, we also observed a reshaping of the eye  
82 transcriptome that revealed a coordinated downregulation of the ecdysone  
83 biosynthesis pathway, associated with decreased Histone Deacetylases (HDACs)  
84 activity. Overall, our study provides the first evidence of an increase in translation  
85 dependent on a heightened *eif6* gene dosage, that is likely to determine metabolic

86 changes and a transcriptional rewiring of a developing organ. We demonstrate that  
87 the overexpression of eIF6 causes a delay and an increase in apoptosis and the  
88 shutdown of hormonal signalling, providing a new and simple model to screen for  
89 therapeutic molecules relevant for cancers with aberrant *eif6* gene dosage.

## 90 RESULTS

### 91 **DeIF6 overexpression severely alters eye development**

92 To study the role of DeIF6 during development we first used the *P* element allele  
93 *eIF6*<sup>k13214</sup><sup>25</sup>. To examine the effect of *Deif6* loss of function in mosaic animals, we  
94 induced mitotic clones homozygous for *eIF6*<sup>k13214</sup> in first instar larvae by heat shock-  
95 induced FLIP/*FLP*-mediated homologous recombination<sup>26</sup>. We did not observe  
96 clones of mutant cells with the exception of small ones in the wing margin. Similar  
97 results were obtained in a *minute* (*M*) background that provides a growth advantage  
98 to mutant cells, or by targeted expression of *FLP* in the wing margin (Figure S1a).  
99 Together, these results indicate that eIF6 is strictly required for cell viability in  
100 *Drosophila*.

101 To assess the effects of the gain of function, we overexpressed *Deif6* ubiquitously  
102 using the *TubGAL4* driver. Ectopic expression resulted in late embryonic lethality  
103 (Figure S1b). To circumvent early lethality, we focused on a non-essential fly organ,  
104 the eye. DeIF6 overexpression during late eye disc development, using the  
105 *GMRGAL4* driver, caused the formation of a *rough* adult eye (Figure 1a-b). A *rough*  
106 eye is often associated with alterations in the fine structure of the compound eye<sup>27</sup>,  
107 <sup>28, 29, 30</sup>. Indeed, SEM analysis showed severe disruption of the stereotypic structure  
108 of the wild-type eye, with flattened ommatidia and bristles arranged in random  
109 patterns (Figure 1c). Moreover, semithin sections evidenced that the *roughness* was  
110 not due to loss of photoreceptors, but rather to an aberrant arrangement of cells  
111 (Figure 1d). These data show that increasing DeIF6 gene dosage in the fly eye  
112 causes developmental alteration that allows the characterization of DeIF6 functions  
113 during the early events associated with its increased expression.

114

## 115 **Increased *Deif6* gene dosage results in elevated translation**

116 Since eIF6 plays a role in the regulation of translation by binding 60S subunits and  
117 preventing premature association into an 80S complex <sup>14</sup>, we then asked what  
118 happens to translation *in vivo*, with increased eIF6 gene dosage. To this end, we first  
119 assessed the number of eIF6 binding sites on *Drosophila* 60S subunits using an *in*  
120 *vitro* Ribosome Interaction Assay (iRIA) recently developed <sup>31</sup>. We found that the  
121 expression of DeIF6 in larval eye discs led to 25% reduction of free 60S sites when  
122 compared to control (Figure 1e), indicating that the ectopic expressed protein was  
123 able to bind the 60S, thus retaining its functionality. Next, using a modified SUnSET  
124 assay <sup>32</sup>, we measured translation in eye imaginal discs treated *ex vivo* with  
125 puromycin, incorporated in protein nascent chains by ribosomes. Remarkably, in the  
126 condition of DeIF6 overexpression, cells incorporate almost twice the amount of  
127 puromycin of controls (Figure 1f-g). Taken together, our biochemical experiments  
128 reveal that eIF6 overexpression reduces the free 60S pool and increases puromycin  
129 incorporation, i.e. translation.

130 To evaluate whether increased puromycin incorporation upon eIF6 overexpression  
131 was specific to *Drosophila*, we overexpressed human eIF6 in HEK293T cells grown  
132 upon serum stimulation and examined puromycin incorporation with a cytofluorimeter.  
133 Upon eIF6 2-fold expression relative to control (Figure S1c), we observed an  
134 increase in puromycin incorporating cells in the condition of increased eIF6 (Figure  
135 S1d-e). These data demonstrate that increased eIF6 leads to a conserved elevation  
136 of the general translational rate, both *in vivo* and in cultured cells.

137

## 138 **DeIF6 overexpression impairs apoptosis during pupal development**

139 To understand how deregulated protein synthesis leads to the tissue defects  
140 observed upon *DeIF6* overexpression, we performed a thorough analysis of eye  
141 development. Analyzing larval eye discs revealed no differences in morphology or  
142 cell identity compared to control (Figure S2a-c). Then, we analyzed the effect of  
143 *DeIF6* overexpression during pupal development. We found that at 40h after  
144 puparium formation (APF) both neuronal and cone cells were present in the correct  
145 number. Conversely, we observed that the intra/inter-ommatidial morphology was  
146 altered (Figure 2). One of the fundamental events controlling ommatidial morphology  
147 is a developmentally-controlled wave of Programmed Cell Death (PCD), sweeping  
148 the tissue from 25h to 40h APF<sup>24</sup>. TUNEL assay showed the absence of apoptotic  
149 nuclei at 28h APF when *DeIF6* was overexpressed, whereas the *GMRGAL4/+*  
150 retinae showed many of them (Figure S3a). Thus, we analyzed the *Drosophila*  
151 effector caspase Dcp-1 by immunostaining at 40h APF. Compared to control retinae  
152 showing the presence of apoptotic cells, these were completely absent in *DeIF6*  
153 overexpressing retinae (Figure 3a). Interestingly, 60h APF *DeIF6* overexpressing  
154 retinae showed Dcp-1 positive cells. In contrast, 60h APF wild-type retinae did not  
155 show any apoptotic cell, confirming the end of the PCD (Figure 3b). We determined  
156 the number of Dcp-1 positive cells at 40h APF and 60h APF, revealing a striking 75%  
157 reduction in the number of apoptotic cells at 40h APF and an 80% increase in *DeIF6*  
158 overexpressing retinae at 60h APF (Figure 3c).

159 A defect in apoptosis was confirmed by staining to detect expression of the  
160 *Drosophila*  $\beta$ -catenin homologue Armadillo (Figure 4). Armadillo localizes to  
161 membranes of cells surrounding photoreceptors, giving an indication of their number.  
162 At 40h APF, we observed that wild-type retinae presented the typical staining  
163 expected for Armadillo, while *DeIF6* overexpressing retinae showed the presence of



164 extra-numerary cells around the ommatidial core (Figure 4a), in line with the  
165 possibility that these were not removed by PCD. By counting the number of cells in  
166 each ommatidium, we determined that *DeIF6* overexpressing retinæ possessed  
167 more than 15 cells, corresponding to approximately 30% more than that of a wild-  
168 type ommatidium (Figure S4a). Later in development, both at 60h and 72h APF,  
169 while in wild-type retinæ the pattern of Armadillo was maintained, in *DeIF6*  
170 overexpressing retinæ Armadillo was no longer detectable (Figure 4b and S4b). This  
171 result suggests that all cells around photoreceptors might fail to terminally  
172 differentiate, perhaps due to the late surge of apoptosis upon *DeIF6* overexpression.  
173 Our results demonstrate that the first developmental effect observed upon *DeIF6*  
174 overexpression is a strong delay in the onset of PCD, which might be the cause of  
175 the *rough* eye phenotype.

176

### 177 **Overexpression of *DeIF6* specifically in cone and pigment cells is sufficient to** 178 **alter PCD**

179 Both cone and inter-ommatidial cells (IOCs) are responsible for the removal of extra-  
180 numerary cells to determine the correct number of ommatidial cells<sup>33</sup>. Thus, we  
181 overexpressed *DeIF6* in either one of these two cell types, with the *spaGAL4* or  
182 *54CGAL4* drivers, respectively. Here, the overexpression of *DeIF6* resulted in a  
183 *rough* eye phenotype, albeit a milder one with respect to the one observed with the  
184 *GMRGAL4* driver (Figure 5a, S5a). Semithin sections of *spa>DeIF6* adult eyes  
185 confirmed the loss of the eye structure but, similarly to the *GMR>DeIF6* phenotype,  
186 revealed that photoreceptors were unaffected (Figure 5b). Characterization of pupal  
187 *spa>DeIF6* retinæ confirmed that the overexpression of *DeIF6* was confined to cone  
188 cells (Figure 5c). In addition, similar to *GMR>DeIF6* retinæ, the staining of the

189 markers ELAV and CUT demonstrated that cell identity was maintained, but that  
190 arrangement of cells on the plane of the tissue was disrupted (Figure S5b). Dcp-1  
191 staining was completely absent in 40h APF retinæ overexpressing *DeIF6* specifically  
192 in the cone cells (Figure S5c) and present instead at 60h APF (Figure 5d),  
193 confirming the delay in apoptosis, observed in *GMRGAL4>DeIF6* retinæ. To further  
194 confirm that the *rough* eye phenotype that we observed was strictly related to a  
195 defect in PCD, we blocked apoptosis by co-expressing *DeIF6* and the Baculovirus  
196 caspase inhibitor p35, under the control of the *GMRGAL4* driver. Strikingly, we  
197 observed an almost complete suppression of the *rough* eye phenotype (Figure 5e-f).  
198 Together, these results indicate that overexpression of *DeIF6* specifically in cone cell  
199 subtype is sufficient to cause the delay in PCD likely responsible for the *rough* eye  
200 phenotype.

201

### 202 **Developmental defects associated with increased *DeIF6* levels are not tissue** 203 **specific**

204 Once determined that the *rough* eye phenotype induced by *DeIF6* overexpression  
205 correlated with an increase in general translation and with altered PCD during pupal  
206 development, we asked whether such defects were specific for the eye, or a more  
207 general effect associated with increased *Deif6* gene dosage. Thus, we  
208 overexpressed *DeIF6* in a different epithelial organ, the wing, using the *MSGAL4*  
209 driver. Such manipulation led to complete disruption of the adult wing structure  
210 (Figure 6a). Moreover, we performed the SUnSET assay on wing imaginal discs, and  
211 as in eye discs, we observed a two-fold increase in puromycin incorporation upon  
212 *DeIF6* overexpression (Figure 6b and 6c). Furthermore, *DeIF6* overexpression in  
213 wing discs led to a dramatic increase in apoptotic cells in the dorsal portion of the

214 disc (Figure 6d). These results indicate that regulation of the *Deif6* gene dosage is  
215 fundamental for the correct development of multiple organs and that ectopic  
216 expression is detrimental by inducing a marked increase in translation and apoptosis.

217

218 **Gene expression analysis reveals that higher DeIF6 levels reshape**  
219 **transcriptome, resulting in altered ribosome maturation and ecdysone**  
220 **signalling**

221 After assessing that increased DeIF6 levels in different tissues led to increased  
222 translation and apoptosis, we asked whether DeIF6 was also able to induce a  
223 transcriptional rewiring. Thus, we performed a comprehensive gene expression  
224 analysis by RNA-Seq of two distinct stages of eye development, by comparing larval  
225 eye imaginal discs and pupal retinæ of *GMRGAL4/+* and *GMR>DeIF6* genotypes  
226 (Figure 7). In both developmental stages, we observed similar changes between the  
227 two genotypes, which included upregulation of genes related to ribosome biogenesis  
228 in *GMR>DeIF6* samples (File S1, Figure 7a and Figure S6a). Strikingly, GSAA  
229 analysis revealed also an increase in mRNAs of genes involved in rRNA processing  
230 (Figure S6a). These data show that eIF6 is a powerful inducer of ribosome  
231 biogenesis. Moreover, consistent with our phenotypic analysis, DeIF6  
232 overexpressing retinæ displayed upregulation of genes involved in eye development  
233 and in PCD (Figure 7 a,c and File S1). Conversely, mRNAs encoding specialized  
234 eye enzymes, such as those of pigment biosynthetic pathways, were downregulated  
235 in *GMR>DeIF6* samples (File S1), consistent with the altered adult eye morphology.  
236 Interestingly, the most changed genes associated with DeIF6 overexpression in eye  
237 imaginal discs belonged to the ecdysone pathway, with a striking downregulation in  
238 *GMR>DeIF6* samples of many genes involved in 20-HydroxyEcdysone (20-HE)

239 biosynthesis (Figure 7 a, b). For example, *phm*, *sad* and *nvd* (Figure S6b) were  
240 almost absent in *DeIF6* overexpressing eye imaginal disc, and also early (*rbp*) and  
241 late (*ptp52f*) responsive genes belonging to the hormone signaling cascade were  
242 downregulated (File S1). These results strongly indicate the silencing of ecdysone  
243 pathway upon ectopic *DeIF6* expression. Furthermore, chromosome organization  
244 gene sets were found upregulated in our larval GSAA analysis upon *DeIF6*  
245 overexpression (Figure S6c, File S1). suggesting a possible effect of *DeIF6* on  
246 epigenome. Thus, we decided to measure the enzymatic activity of HDACs, which  
247 remove acetyl groups from histones<sup>34, 35</sup>, founding an interesting two-fold reduction  
248 in HDACs activity upon *DeIF6* overexpression when compared to control (Figure 7d).  
249 Consistently, it has been demonstrated that transcription of ecdysone biosynthetic  
250 enzymes is under epigenetic control<sup>36, 37</sup>. Overall, we demonstrated that increased  
251 *DeIF6* gene dosage correlates with a dramatic reduction in transcription of ecdysone  
252 biosynthesis and signaling genes as well as to a reduction of HDACs activity,  
253 providing a potential causal link between transcriptional rewiring and translation.

254

### 255 **20-HE administration partially rescues pupal PCD defects and eye roughness**

256 The observation that ecdysone biosynthesis and signaling genes were strongly  
257 downregulated upon *DeIF6* overexpression led us to determine whether hormonal  
258 silencing accounted for the *GMR>DeIF6* phenotype. To assess this, we fed third  
259 instar larvae with 20-HE, and we analyzed apoptosis at 40h APF and adult eye  
260 morphology. Notably, we found a partial rescue of the apoptotic phenotype (Figure  
261 7e). Indeed, immunofluorescence staining for Dcp-1 showed the presence of  
262 apoptotic cells in 40h APF *GMR>DeIF6* retinæ treated with 20HE, while  
263 overexpressing untreated retinæ did not show any Dcp-1 positive cell (Figure 7e).

264 Accordingly, following 20-HE treatment, we observed a partial rescue of the *rough*  
265 eye phenotype in adults. Indeed, when DeIF6 was overexpressed, eyes were 30%  
266 smaller than control. Instead, DeIF6 overexpressing larvae fed with 20-HE showed  
267 eyes 20% bigger than controls, even if still smaller respect to *GMRGAL4/+* (Figure  
268 7f).

269 These data indicate that the developmental apoptotic defect and the associated  
270 *rough* eye phenotype depend on the reduction of ecdysone signaling.

## 271 **DISCUSSION**

272 We demonstrate that higher levels of eIF6 are sufficient to induce an increase in  
273 ribosome biogenesis and translation that generates a complex transcriptional and  
274 metabolic reprogramming that blocks apoptosis and causes the shutoff of hormonal  
275 production (Figure 8). Rescue of hormonal supply partly reverts apoptosis and the  
276 related developmental deficits, demonstrating that translation acts upstream of  
277 transcription and metabolism *in vivo*.

278 Translation is the most energy consuming process in cells <sup>38</sup> and thus is tightly  
279 regulated, mostly in its initiation step. Recently, many studies have highlighted how  
280 alterations in the ribosomal machinery and/or in translational control are involved in  
281 several pathologies <sup>39</sup>. Increased protein synthesis was often interpreted as a  
282 general by-product of increased proliferation. eIF6 has been found upregulated in  
283 many cancers, including mesothelioma, breast and colorectal cancer <sup>13, 16, 40</sup>.  
284 Conversely, eIF6-haploinsufficiency protects mice from lymphomagenesis in an E $\mu$ -  
285 Myc model <sup>15</sup>. In our eIF6 overexpressing model, we observe an increase in mRNAs  
286 encoding for rRNA processing factors, suggesting that ribosome biogenesis is  
287 upregulated when eIF6 levels are heightened. Interestingly, we also show that the  
288 overexpression of DeIF6 causes a two-fold increase in general translation both in the  
289 developing eye and wing. These data show that *in vivo* eIF6 can act in a feed-  
290 forward loop that amplifies the efficiency of the translational machinery, and suggest  
291 that its upregulation may provide an advantage to cancer cells, through an  
292 upregulation of both ribosome biogenesis and general translation.

293 How could an increase in translation dictated by excess eIF6 impact tumour cell fate?  
294 A clue to this is represented by the inhibition of physiological PCD in the fly eye  
295 during the pupal stage <sup>33</sup> upon DeIF6 overexpression, as previously observed in X.

296 *laevis*<sup>41</sup>. Such changes in apoptosis are mirrored in our transcriptome analysis. We  
297 performed two independent gene expression analyses, in two distinct developmental  
298 windows: the first in the larva, to appreciate the early events associated with Delf6  
299 overexpression, the latter in the mid-pupal stage when we observed the apoptotic  
300 defect, which reveals an upregulation of apoptotic genes in overexpressing eyes. We  
301 observe that Delf6 causes a delay and an increase in PCD, that is in itself  
302 responsible for the *rough* eye phenotype. Overall, the effects of the manipulation of  
303 Delf6 levels result in a change in apoptosis that is therefore explained by  
304 transcriptional changes. This observation means that protein synthesis can acquire a  
305 driver role in transcription.

306 In summary, our data are consistent with two possibilities: developmental PCD could  
307 be delayed by excess Delf6. Alternatively, PCD could be repressed at the correct  
308 developmental time and apoptotic elimination of defective cells overexpressing  
309 Delf6 could be triggered later independently of developmental signals. The fact that  
310 overexpression of Delf6 in wing discs, which are not subjected to developmental  
311 apoptosis, leads to cell death supports the latter hypothesis. Overall, these  
312 considerations indicate that the advantage provided by excess Delf6 to tumour cells  
313 might initially consist in escape from apoptotic clearance, but eventually, tumour cells  
314 might need to be protected from the deleterious effects of Delf6 overexpression.

315 We have experimentally defined the molecular sequence of events that precede and  
316 follow the inhibition of apoptosis upon Delf6 overexpression in eye discs. We found  
317 that an upregulation of general translation causes a gross change in the  
318 transcriptome that has a coordinated impact on biological processes, including  
319 apoptosis. Importantly, gene expression analysis performed in the larvae strongly  
320 argues for reduced ecdysone biosynthesis and signaling and 20-HE treatment leads

321 to a partial rescue of the pupal apoptotic defect and consequently of the *rough* eye  
322 phenotype. Therefore, our data place DelF6 upstream of ecdysone regulation, that is  
323 in turn responsible for the incapability of DelF6 overexpressing retinæ to undergo  
324 apoptosis in the right developmental window. It has been established that epigenetic  
325 changes control the transcription of ecdysone biosynthetic enzymes <sup>36, 37</sup>. We  
326 previously found that, in mammals, eIF6 haploinsufficiency caused a puzzling  
327 signature that mimicked alterations obtained by histones acetylation inhibitors <sup>11</sup>.  
328 Intriguingly, our larval GSAA analysis unveils that genes belonging to the  
329 chromosome organization gene set, such as *Gcn5* and *Ada1-2*, are upregulated  
330 when DelF6 is overexpressed. Here, we show that DelF6 expression leads to a  
331 decrease in HDACs activity. Thus, the data suggest that DelF6 overexpression  
332 causes a transcriptional reshaping that leads to complex epigenetic changes which  
333 in turn prevent the transcription of mRNAs of the ecdysone biosynthetic pathway.  
334 This new mechanistic effect extends the previous observation that demonstrated the  
335 role of eIF6 in the translation of uORFs containing mRNAs <sup>11, 42</sup>. Curiously, an HTS  
336 screening for modulators of chromatin structure, years ago identified as a major  
337 player another initiation factor, eIF3h <sup>43</sup>.

338 In summary, our study demonstrates that overexpression of eIF6 in developing  
339 organs is sufficient to induce an increase in ribosome biogenesis and translation that  
340 correlates with a complex transcriptional and metabolic changes leading to apoptotic  
341 and hormonal defects. Rescue of apoptosis defect and the related developmental  
342 deficits by hormone supplementation indicates that eIF6 activity on ribosome  
343 biogenesis and translation control is likely the cause of transcriptional and metabolic  
344 changes that induce the phenotype *in vivo* (Figure 8). It will be interesting to use the  
345 *Drosophila* model that we have established and presented here for *in vivo* screening



346 of compounds that suppress the effect of eIF6 overexpression to isolate useful  
347 therapeutics relevant to the protumorigenic role of mammalian eIF6.

## 348 MATERIALS AND METHODS

### 349 Genetics

350 Fly strains were maintained on standard cornmeal food at 18°C. Genetic crosses  
351 were performed at 25°C, with the exception of *GMRGAL/+* and *GMR>deIF6*,  
352 performed at 18°C. The following fly mutant stocks have been used: *GMRGAL4/CTG*  
353 was a gift from Manolis Fanto (King's College, London); *UAS-DeIF6* was a gift from  
354 William J Brook (Alberta Children's Hospital, Calgary)<sup>44</sup>. Lines obtained from the  
355 Bloomington Drosophila Stock Center (BDSC): *spaGAL4* (26656), *54CGAL4*  
356 (27328), *w1118*, *UAS-p35* (5072), *UAS-mCD8GFP* (32184), *MSGAL4* (8860).

357

### 358 Mosaic analysis

359 The *DeIF6*<sup>k13214</sup> mutant clones were created by *Flippase* (*FLP*) mediated mitotic  
360 recombination<sup>26</sup>. The *DeIF6*<sup>k13214</sup> (*P(w[+mC]=lacW) eif6[k13214]ytr[k13214]*) *P*  
361 element allele was recombined onto the right arm of chromosome two with the  
362 homologous recombination site (FRT) at 42D using standard selection techniques.  
363 Briefly, to create the FRT *y*<sup>+</sup> *pwn*, *DeIF6*<sup>k13214</sup> chromosomes, *DeIF6*<sup>k13214</sup> was  
364 recombined onto the FRT chromosome originating from the *y*; *P{FRT}42D pwn[1]*  
365 *P{y+}44B/CyO* parental stock. The *yellow*<sup>+</sup> *pwn DeIF6*<sup>k13214</sup> *G418* resistant flies were  
366 selected to create stocks for clonal analysis. Similarly, stocks used for generating  
367 unmarked *DeIF6*<sup>k13214</sup> clones were created by recombining *DeIF6*<sup>k13214</sup> with the 42D  
368 FRT chromosome using the *w[1118]; P{FRT}42D P{Ubi-GFP}2R/CyO* parental line.  
369 Targeted mitotic wing clones were generated by crossing flies with *UAS-FLP*, the  
370 appropriate GAL4 driver and the suitable 42D FRT second chromosome with the  
371 42D FRT *DeIF6*<sup>k13214</sup>. The *hs* induced *DeIF6*<sup>k13214</sup> mitotic clones were created by

372 following standard techniques. Briefly, 24 and 48 hours larvae with the appropriate  
373 genotypes were heat shocked for 1 hour at 37°C followed by incubation at 25°C.

374

### 375 **Cell culture and transfections**

376 HEK293T cells were grown in DMEM (Lonza, Basel, Switzerland) supplemented with  
377 10% Fetal Bovine Serum (FBS) and 1% penicillin, streptomycin, L-glutamine (Gibco,  
378 Waltham, MA, USA) and maintained at 37°C and 5% CO<sub>2</sub>. Mycoplasma testing was  
379 performed before experiments. Cells were transfected with pcDNA3.1-eIF6<sup>19</sup>, or an  
380 empty vector, with Lipofectamine® 2000 (Invitrogen, Carlsbad, CA, USA,  
381 #11668019) following manufacturer protocol.

382

### 383 **RNA isolation and RNA sequencing**

384 Total RNA was extracted with mirVana™ isolation kit according to the manufacturer  
385 protocols (ThermoFisher Scientific, Waltham, MA, USA, #AM 1560) from 10 eye  
386 imaginal discs (larval stage) or 10 retinæ (pupal stage). RNA quality was controlled  
387 with BioAnalyzer (Agilent, Santa Clara, CA, USA). Libraries for Illumina sequencing  
388 were constructed from 100 ng of total RNA with the Illumina TruSeq RNA Sample  
389 Preparation Kit v2 (Set A) (Illumina, San Diego, CA, USA). The generated libraries  
390 were loaded on to the cBot (Illumina) for clustering on a HiSeq Flow Cell v3. The flow  
391 cell was then sequenced using a HiScanSQ (Illumina). A paired-end (2×101) run was  
392 performed using the SBS Kit v3 (Illumina). Sequence deepness was at 35 million  
393 reads.

394

### 395 **Bioinformatic Analysis**

396 *Read pre-processing and mapping*

397 Three biological replicates were analyzed for *GMRGAL4/+* and *GMR>DeIF6* larval  
398 eye imaginal discs and four biological replicates were analyzed for *GMRGAL4/+* and  
399 *GMR>DeIF6* pupal retinae, for a total of 14 samples. Raw reads were checked for  
400 quality by FastQC software (version 0.11.2, S., A. FastQC: a quality control tool for  
401 high-throughput sequence data. 2010; Available from:  
402 <http://www.bioinformatics.babraham.ac.uk/projects/fastqc>), and filtered to remove  
403 low quality calls by Trimmomatic (version 0.32)<sup>45</sup> using default parameters and  
404 specifying a minimum length of 50. Processed reads were then aligned to *Drosophila*  
405 *melanogaster* genome assembly GRCm38 (Ensembl version 79) with STAR  
406 software (version 2.4.1c)<sup>46</sup>.

407 *Gene expression quantification and differential expression analysis.*

408 HTSeq-count algorithm (version 0.6.1, option -s = no, gene annotation release 79  
409 from Ensembl)<sup>47</sup> was employed to produce gene counts for each sample. To  
410 estimate differential expression, the matrix of gene counts produced by HTSeq was  
411 analyzed by DESeq2 (version DESeq2\_1.12.4)<sup>48</sup>.

412 The differential expression analysis by the DeSeq2 algorithm was performed on the  
413 entire dataset composed by both larvae and pupae samples. The two following  
414 comparisons were analyzed: *GMR>DeIF6 versus GMRGAL4/+* larval eye imaginal  
415 discs (6 samples overall) and *GMR>DeIF6 versus GMRGAL4/+* pupal retinae (8  
416 samples in total). Reads counts were normalized by calculating a size factor, as  
417 implemented in DESeq2. Independent filtering procedure was then applied, setting  
418 the threshold to the 62 percentile; 10886 genes were therefore tested for differential  
419 expression.

420 Significantly modulated genes in *GMR>DeIF6* genotype were selected by  
421 considering a false discovery rate lower than 5%.

422 Regularized logarithmic (rlog) transformed values were used for heat map  
423 representation of gene expression profiles.

424 Analyses were performed in R version 3.3.1 (2016-06-21, Computing, T.R.F.f.S. R: A  
425 Language and Environment for Statistical Computing. Available from: [http://www.R-](http://www.R-project.org/)  
426 [project.org/](http://www.R-project.org/)).

#### 427 Functional analysis by topGO

428 The Gene Ontology enrichment analysis was performed using topGO R  
429 Bioconductor package (version topGO\_2.24.0). The option *nodesize* = 5 is used to  
430 prune the GO hierarchy from the terms which have less than 5 annotated genes and  
431 the *annFUN.db* function is used to extract the gene-to-GO mappings from the  
432 genome-wide annotation library *org.Dm.eg.db* for *D. melanogaster*. The statistical  
433 enrichment of GO was tested using the Fisher's exact test. Both the "classic" and  
434 "elim" algorithms were used.

#### 435 Gene set association analysis

436 Gene set association analysis for larvae and pupae samples was performed by  
437 GSAA software (version 2.0)<sup>49</sup>. Raw reads for 10886 genes identified by Entrez  
438 Gene ID were analyzed by GSAASeqSP, using gene set C5 (*Drosophila* version  
439 retrieved from <http://www.go2msig.org/cgi-bin/prebuilt.cgi?taxid=7227>) and  
440 specifying as permutation type 'gene set' and as gene set size filtering min 15 and  
441 max 800.

442

#### 443 **Western blotting and antibodies**

444 Larval imaginal discs, pupal retinae and adult heads were dissected in cold  
445 Phosphate Buffer Saline (Na<sub>2</sub>HPO<sub>4</sub> 10 mM, KH<sub>2</sub>PO<sub>4</sub> 1.8 mM, NaCl 137 mM, KCl 2.7  
446 mM, pH 7.4) (PBS) and then homogenized in lysis buffer (HEPES 20 mM, KCl 100

447 mM, Glycerol 5%, EDTA pH 8.0 10 mM, Triton-X 0.1%, DTT 1mM) freshly  
448 supplemented with Protease Inhibitors (Sigma, St. Louis, MO, USA, #P8340).  
449 Protein concentration was determined by BCA analysis (Pierce, Rockford, IL, USA,  
450 #23227). Equal amounts of proteins were loaded and separated on a 10% SDS-  
451 PAGE, then transferred to a PVDF membrane. Membranes were blocked in 10%  
452 Bovine Serum Albumin (BSA) in PBS-Tween (0.01%) for 30 minutes at 37°C. The  
453 following primary antibodies were used: rabbit anti-eIF6 (1:500, this study), rabbit  
454 anti- $\beta$ -actin (1:4000, CST, Danvers, MA, USA, #4967). To produce the anti-eIF6  
455 antibody used in this study, a rabbit polyclonal antiserum against two epitopes on  
456 COOH-terminal peptide of eIF6 (NH<sub>2</sub>-CLSFVGMNTTATEI-COOH eIF6 203-215 aa;  
457 NH<sub>2</sub>-CATVTTKLRAALIEDMS-COOH eIF6 230-245 aa) was prepared by  
458 PrimmBiotech (Milan, Italy, Ab code: 201212-00003 GHA/12), purified in a CNBr-  
459 Sepharose column and tested for its specificity against a mix of synthetic peptides  
460 with ELISA test. The following secondary antibodies were used: donkey anti-mouse  
461 IgG HRP (1:5000, GE Healthcare, Little Chalfont, UK, Amersham #NA931) and  
462 donkey anti-rabbit IgG HRP (1:5000, GE Healthcare, Amersham #NA934).

463

#### 464 **SUnSET Assay**

465 Larval imaginal eye and wing discs were dissected in complete Schneider medium  
466 (Lonza, Basel, Switzerland) and treated *ex vivo* with puromycin (50  $\mu$ g/mL) for 30  
467 minutes at room temperature, then fixed in 3% paraformaldehyde (PFA) for 1 hour at  
468 room temperature. Immunofluorescences were then performed as described below,  
469 using a mouse anti Puromycin (1:500, Merck Millipore, Billerica, MA, USA,  
470 #MABE343) as a primary antibody. Discs were then examined by confocal  
471 microscope (Leica SP5, Leica, Wetzlar, Germany) and fluorescence intensity was

472 measured with ImageJ software. For protein synthesis measurement in HEK293T  
473 cells, after 48 hours of transfection with the pcDNA3.1-eIF6 or the empty vector, we  
474 followed the adapted SUnSET protocol described in <sup>50</sup>. All experiments were  
475 performed at least three times, in triplicate.

476

#### 477 **Cells count**

478 *GMRGAL4/+* and *GMR>DeIF6* pupal retinæ at 40h APF were dissected, fixed, and  
479 stained with anti-Armadillo to count cells, as previously described <sup>51</sup>. Cells contained  
480 within a hexagonal array (an imaginary hexagon that connects the centres of the  
481 surrounding six ommatidia) were counted; for different genotypes, the number of  
482 cells per hexagon was calculated by counting cells, compared with corresponding  
483 control. Cells at the boundaries between neighbouring ommatidia count half. At least  
484 3 hexagons (equivalent to 9 full ommatidia) were counted for each genotype, and  
485 phenotypes were analysed. Standard Deviation (SD) was used as statistical analysis.

486

#### 487 **Immunofluorescences, antibodies and TUNEL Assay**

488 Larval imaginal discs and pupal retinæ were dissected in cold PBS and fixed in 3%  
489 paraformaldehyde (PFA) for 1 hour at room temperature, then washed twice with  
490 PBS and blocked in PBTB (PBS, Triton 0.3%, 5% Normal Goat Serum and 2%  
491 Bovine Serum Albumin) for 3 hours at room temperature. Primary antibodies were  
492 diluted in PBTB solution and incubated O/N at 4°C. After three washes with PBS,  
493 tissues were incubated O/N at 4°C with secondary antibodies and DAPI (1:1000,  
494 Molecular Probes, Eugene, OR, USA, #D3571) in PBS. After three washes with PBS,  
495 eye imaginal discs and retinæ were mounted on slides with ProLong Gold  
496 (LifeTechnologies, Carlsbad, CA, USA, #P36930). The following primary antibodies

497 were used: rabbit anti-eIF6 (1:50, this study), rat anti-ELAV (1:100, Developmental  
498 Study Hybridoma Bank DSHB, Iowa City, IA, USA, #7E8A10), mouse anti-CUT  
499 (1:100, DSHB, #2B10), mouse anti-Rough (1:100, DSHB, #ro-62C2A8), mouse anti-  
500 Armadillo (1:100, DSHB, #N27A), mouse anti-Chaoptin (1:100, DSHB, #24B10),  
501 rabbit anti- Dcp-1 (1:50, CST, #9578), mouse anti-Puromycin (1:500, Merck Millipore,  
502 #MABE343). The following secondary antibodies were used: donkey anti-rat, donkey  
503 anti-mouse, donkey anti-rabbit (1:500 Alexa Fluor® secondary antibodies, Molecular  
504 Probes). Dead cells were detected using the In Situ Cell Death Detection Kit TMR  
505 Red (Roche, Basel, Switzerland, #12156792910) as manufacturer protocol, with  
506 some optimization. Briefly, retinae of the selected developmental stage were  
507 dissected in cold PBS and fixed with PFA 3% for 1 hour at room temperature. After  
508 three washes in PBS, retinae were permeabilized with Sodium Citrate 0.1%-Triton-X  
509 0.1% for 2 minutes at 4°C and then incubated overnight at 37°C with the enzyme mix.  
510 Retinae were then rinsed three times with PBS, incubated with DAPI to stain nuclei  
511 and mounted on slides. Discs and retinae were examined by confocal microscopy  
512 (Leica SP5) and analysed with Volocity 6.3 software (Perkin Elmer, Waltham, MA,  
513 USA). All immunofluorescences were performed at least on three independent  
514 experiments.

515

### 516 **Semithin sections**

517 Semithin sections were prepared as described in <sup>52</sup>. Adult eyes were fixed in 0.1 M  
518 Sodium Phosphate Buffer, 2% glutaraldehyde, on ice for 30 min, then incubated with  
519 2% OsO<sub>4</sub> in 0.1 M Sodium Phosphate Buffer for 2 hours on ice, dehydrated in  
520 ethanol (30%, 50%, 70%, 90%, and 100%) and twice in propylene oxide. Dehydrated  
521 eyes were then incubated O/N in 1:1 mix of propylene oxide and epoxy resin (Sigma,



522 Durcupan™ ACM). Finally, eyes were embedded in pure epoxy resin and baked O/N  
523 at 70°C. The embedded eyes were cut on a Leica UltraCut UC6 microtome using a  
524 glass knife and images were acquired with a 100X oil lens, Nikon Upright XP61  
525 microscope (Nikon, Tokyo, Japan).

526

### 527 **Ecdysone treatment**

528 For ecdysone treatment, 20-HydroxyEcdysone (20HE) (Sigma, #H5142) was  
529 dissolved in 100% ethanol to a final concentration of 5 mg/mL; third instar larvae  
530 from different genotypes (*GMRGAL4/+* and *GMR>DeIF6*) were collected and placed  
531 in individual vials on fresh standard cornmeal food supplemented with 240 µg/mL 20-  
532 HE. Eye phenotype was analyzed in adult flies, and images were captured with a  
533 TOUPCAM™ Digital camera. Eye images were analyzed with ImageJ software.

534

### 535 **In vitro Ribosome Interaction Assay (iRIA)**

536 iRIA assay was performed as described in <sup>31</sup>. Briefly, 96-well plates were coated with  
537 a cellular extract diluted in 50 µL of PBS, 0.01% Tween-20, O/N at 4°C in humid  
538 chamber. Coating solution was removed and aspecific sites were blocked with 10%  
539 BSA, dissolved in PBS, 0.01% Tween-20 for 30 minutes at 37 °C. Plates were  
540 washed with 100 µL/well with PBS-Tween. 0.5 µg of recombinant biotinylated eIF6  
541 were resuspended in a reaction mix: 2.5 mM MgCl<sub>2</sub>, 2% DMSO and PBS-0.01%  
542 Tween, to reach 50 µL of final volume/well, added to the well and incubated with  
543 coated ribosomes for 1 hour at room temperature. To remove unbound proteins,  
544 each well was washed 3 times with PBS, 0.01% Tween-20. HRP-conjugated  
545 streptavidin was diluted 1:7000 in PBS, 0.01% Tween-20 and incubated in the well,  
546 30 minutes at room temperature, in a final volume of 50 µL. Excess of streptavidin

547 was removed through three washes with PBS-Tween. OPD (o-phenylenediamine  
548 dihydrochloride) was used according to the manufacturer's protocol (Sigma-Aldrich)  
549 as a soluble substrate for the detection of streptavidin peroxidase activity. The signal  
550 was detected after the incubation, plates were read at 450 nm on a multiwell plate  
551 reader (Microplate model 680, Bio-Rad, Hercules, CA, USA). This experiment was  
552 performed at least three times, in triplicate.

553

### 554 **HDACs activity**

555 HDACs activity was measured with the fluorometric HDAC Activity Assay kit (Sigma,  
556 #CS1010-1KT) according to the manufacturer's instructions. Briefly, cells were lysed  
557 with a buffer containing 50 mM HEPES, 150 mM NaCl, and 0.1% Triton X-  
558 100 supplemented with fresh protease inhibitors. 20 µg of cell lysates were  
559 incubated with assay buffer containing the HDACs substrate for 30 minutes at 30°C.  
560 The reaction was terminated, and the fluorescence intensity was measured in a  
561 fluorescence plate reader with Ex. = 350-380 nm and Em. = 440-460 nm.

562

### 563 **Statistical Analysis**

564 Each experiment was repeated at least three times, as biological replicates; means  
565 and standard deviations between different experiments were calculated. Statistical *p*-  
566 values obtained by Student *t*-test were indicated: three asterisks \*\*\* for *p*-values less  
567 than 0.001, two asterisks \*\* for *p*-values less than 0.01 and one asterisks \* for *p*-  
568 values less than 0.05.

569

### 570 **ACCESSION NUMBER**

571 ArrayExpress ID will be provided upon acceptance for publication.

572

## 573 **FUNDING**

574 This work was supported by ERC TRANSLATE 338999 and FONDAZIONE  
575 CARIPLO to SB.

576

## 577 **ACKNOWLEDGEMENTS**

578 We thank William Brook (Alberta Children's Hospital, Calgary) for UASdeif6 stocks  
579 and Manolis Fanto (King's College, London) for stocks and suggestions. We thank  
580 Valeria Berno for imaging help and Vera Giulia Volpi for semithin sections  
581 preparation.

582 The authors declare no competing interests.

583

584 Supplementary Information is available at Cell Death and Differentiation website

585

## 586 **REFERENCES**

- 587 1. Hershey JW, Sonenberg N, Mathews MB. Principles of translational control: an overview.  
588 *Cold Spring Harb Perspect Biol* 2012, **4**(12).
- 589 2. Kressler D, Hurt E, Bassler J. A Puzzle of Life: Crafting Ribosomal Subunits. *Trends Biochem Sci*  
590 2017, **42**(8): 640-654.
- 591 3. Kressler D, Linder P, de La Cruz J. Protein trans-acting factors involved in ribosome  
592 biogenesis in *Saccharomyces cerevisiae*. *Mol Cell Biol* 1999, **19**(12): 7897-7912.
- 593 4. Venema J, Tollervey D. Ribosome synthesis in *Saccharomyces cerevisiae*. *Annu Rev Genet*  
594 1999, **33**: 261-311.
- 595 5. Warner JR, Vilardell J, Sohn JH. Economics of ribosome biosynthesis. *Cold Spring Harb Symp*  
596 *Quant Biol* 2001, **66**: 567-574.
- 597  
598  
599  
600  
601

- 602 6. Robichaud N, Sonenberg N. Translational control and the cancer cell response to stress. *Curr*  
603 *Opin Cell Biol* 2017, **45**: 102-109.  
604
- 605 7. Miluzio A, Beugnet A, Volta V, Biffo S. Eukaryotic initiation factor 6 mediates a continuum  
606 between 60S ribosome biogenesis and translation. *EMBO Rep* 2009, **10**(5): 459-465.  
607
- 608 8. Brina D, Miluzio A, Ricciardi S, Biffo S. eIF6 anti-association activity is required for ribosome  
609 biogenesis, translational control and tumor progression. *Biochim Biophys Acta* 2015,  
610 **1849**(7): 830-835.  
611
- 612 9. Gandin V, Miluzio A, Barbieri AM, Beugnet A, Kiyokawa H, Marchisio PC, *et al.* Eukaryotic  
613 initiation factor 6 is rate-limiting in translation, growth and transformation. *Nature* 2008,  
614 **455**(7213): 684-688.  
615
- 616 10. Ceci M, Gaviraghi C, Gorrini C, Sala LA, Offenhauser N, Marchisio PC, *et al.* Release of eIF6  
617 (p27BBP) from the 60S subunit allows 80S ribosome assembly. *Nature* 2003, **426**(6966): 579-  
618 584.  
619
- 620 11. Brina D, Miluzio A, Ricciardi S, Clarke K, Davidsen PK, Viero G, *et al.* eIF6 coordinates insulin  
621 sensitivity and lipid metabolism by coupling translation to transcription. *Nat Commun* 2015,  
622 **6**: 8261.  
623
- 624 12. Miluzio A, Ricciardi S, Manfrini N, Alfieri R, Oliveto S, Brina D, *et al.* Translational control by  
625 mTOR-independent routes: how eIF6 organizes metabolism. *Biochem Soc Trans* 2016, **44**(6):  
626 1667-1673.  
627
- 628 13. Miluzio A, Oliveto S, Pesce E, Mutti L, Murer B, Grosso S, *et al.* Expression and activity of eIF6  
629 trigger malignant pleural mesothelioma growth in vivo. *Oncotarget* 2015, **6**(35): 37471-  
630 37485.  
631
- 632 14. Sanvito F, Piatti S, Villa A, Bossi M, Lucchini G, Marchisio PC, *et al.* The beta4 integrin  
633 interactor p27(BBP/eIF6) is an essential nuclear matrix protein involved in 60S ribosomal  
634 subunit assembly. *J Cell Biol* 1999, **144**(5): 823-837.  
635
- 636 15. Miluzio A, Beugnet A, Grosso S, Brina D, Mancino M, Campaner S, *et al.* Impairment of  
637 cytoplasmic eIF6 activity restricts lymphomagenesis and tumor progression without affecting  
638 normal growth. *Cancer Cell* 2011, **19**(6): 765-775.  
639
- 640 16. Gatza ML, Silva GO, Parker JS, Fan C, Perou CM. An integrated genomics approach identifies  
641 drivers of proliferation in luminal-subtype human breast cancer. *Nat Genet* 2014, **46**(10):  
642 1051-1059.  
643
- 644 17. Biffo S, Sanvito F, Costa S, Preve L, Pignatelli R, Spinardi L, *et al.* Isolation of a novel beta4  
645 integrin-binding protein (p27(BBP)) highly expressed in epithelial cells. *J Biol Chem* 1997,  
646 **272**(48): 30314-30321.  
647
- 648 18. Donadini A, Giodini A, Sanvito F, Marchisio PC, Biffo S. The human ITGB4BP gene is  
649 constitutively expressed in vitro, but highly modulated in vivo. *Gene* 2001, **266**(1-2): 35-43.  
650
- 651 19. Benelli D, Cialfi S, Pinzaglia M, Talora C, Londei P. The translation factor eIF6 is a Notch-  
652 dependent regulator of cell migration and invasion. *PLoS One* 2012, **7**(2): e32047.

- 653  
654 20. Brand AH, Perrimon N. Targeted gene expression as a means of altering cell fates and  
655 generating dominant phenotypes. *Development* 1993, **118**(2): 401-415.  
656  
657 21. del Valle Rodriguez A, Didiano D, Desplan C. Power tools for gene expression and clonal  
658 analysis in *Drosophila*. *Nat Methods* 2011, **9**(1): 47-55.  
659  
660 22. Kumar JP. Building an ommatidium one cell at a time. *Dev Dyn* 2012, **241**(1): 136-149.  
661  
662 23. Cagan RL, Reh TA. Preface. Aspects of eye development: advances over the past twenty  
663 years. *Curr Top Dev Biol* 2010, **93**: xi-xii.  
664  
665 24. Ready DF, Hanson TE, Benzer S. Development of the *Drosophila* retina, a neurocrystalline  
666 lattice. *Dev Biol* 1976, **53**(2): 217-240.  
667  
668 25. Spradling AC, Stern D, Beaton A, Rhem EJ, Lavery T, Mozden N, *et al.* The Berkeley  
669 *Drosophila* Genome Project gene disruption project: Single P-element insertions mutating  
670 25% of vital *Drosophila* genes. *Genetics* 1999, **153**(1): 135-177.  
671  
672 26. Harrison DA, Perrimon N. Simple and efficient generation of marked clones in *Drosophila*.  
673 *Curr Biol* 1993, **3**(7): 424-433.  
674  
675 27. Basler K, Hafen E. Specification of cell fate in the developing eye of *Drosophila*. *Bioessays*  
676 1991, **13**(12): 621-631.  
677  
678 28. Tomlinson A, Bowtell DD, Hafen E, Rubin GM. Localization of the sevenless protein, a  
679 putative receptor for positional information, in the eye imaginal disc of *Drosophila*. *Cell*  
680 1987, **51**(1): 143-150.  
681  
682 29. Tomlinson A, Kimmel BE, Rubin GM. rough, a *Drosophila* homeobox gene required in  
683 photoreceptors R2 and R5 for inductive interactions in the developing eye. *Cell* 1988, **55**(5):  
684 771-784.  
685  
686 30. Van Vactor DL, Jr., Cagan RL, Kramer H, Zipursky SL. Induction in the developing compound  
687 eye of *Drosophila*: multiple mechanisms restrict R7 induction to a single retinal precursor  
688 cell. *Cell* 1991, **67**(6): 1145-1155.  
689  
690 31. Pesce E, Minici C, Babetaler J, Hurt E, Degano M, Calamita P, *et al.* Direct and high  
691 throughput (HT) interactions on the ribosomal surface by iRIA. *Sci Rep* 2015, **5**: 15401.  
692  
693 32. Schmidt EK, Clavarino G, Ceppi M, Pierre P. SUnSET, a nonradioactive method to monitor  
694 protein synthesis. *Nat Methods* 2009, **6**(4): 275-277.  
695  
696 33. Rusconi JC, Hays R, Cagan RL. Programmed cell death and patterning in *Drosophila*. *Cell*  
697 *Death Differ* 2000, **7**(11): 1063-1070.  
698  
699 34. Buchwald M, Kramer OH, Heinzl T. HDACi--targets beyond chromatin. *Cancer Lett* 2009,  
700 **280**(2): 160-167.  
701  
702 35. de Ruijter AJ, van Gennip AH, Caron HN, Kemp S, van Kuilenburg AB. Histone deacetylases  
703 (HDACs): characterization of the classical HDAC family. *Biochem J* 2003, **370**(Pt 3): 737-749.

- 704  
705 36. Borsos BN, Pankotai T, Kovacs D, Popescu C, Pahi Z, Boros IM. Acetylations of Ftz-F1 and  
706 histone H4K5 are required for the fine-tuning of ecdysone biosynthesis during *Drosophila*  
707 metamorphosis. *Dev Biol* 2015, **404**(1): 80-87.  
708  
709 37. Pankotai T, Popescu C, Martin D, Grau B, Zsindely N, Bodai L, *et al.* Genes of the ecdysone  
710 biosynthesis pathway are regulated by the dATAC histone acetyltransferase complex in  
711 *Drosophila*. *Mol Cell Biol* 2010, **30**(17): 4254-4266.  
712  
713 38. Buttgereit F, Brand MD. A hierarchy of ATP-consuming processes in mammalian cells.  
714 *Biochem J* 1995, **312** ( Pt 1): 163-167.  
715  
716 39. Shenoy N, Kessel R, Bhagat TD, Bhattacharyya S, Yu Y, McMahon C, *et al.* Alterations in the  
717 ribosomal machinery in cancer and hematologic disorders. *J Hematol Oncol* 2012, **5**: 32.  
718  
719 40. Sanvito F, Vivoli F, Gambini S, Santambrogio G, Catena M, Viale E, *et al.* Expression of a  
720 highly conserved protein, p27BBP, during the progression of human colorectal cancer.  
721 *Cancer Res* 2000, **60**(3): 510-516.  
722  
723 41. De Marco N, Iannone L, Carotenuto R, Biffo S, Vitale A, Campanella C. p27(BBP)/eIF6 acts as  
724 an anti-apoptotic factor upstream of Bcl-2 during *Xenopus laevis* development. *Cell Death*  
725 *Differ* 2010, **17**(2): 360-372.  
726  
727 42. Ricciardi S, Miluzio A, Brina D, Clarke K, Bonomo M, Aiolfi R, *et al.* Eukaryotic translation  
728 initiation factor 6 is a novel regulator of reactive oxygen species-dependent megakaryocyte  
729 maturation. *J Thromb Haemost* 2015, **13**(11): 2108-2118.  
730  
731 43. Daxinger L, Oey H, Apedaile A, Sutton J, Ashe A, Whitelaw E. A forward genetic screen  
732 identifies eukaryotic translation initiation factor 3, subunit H (eIF3h), as an enhancer of  
733 variegation in the mouse. *G3 (Bethesda)* 2012, **2**(11): 1393-1396.  
734  
735 44. Ji Y, Shah S, Soanes K, Islam MN, Hoxter B, Biffo S, *et al.* Eukaryotic initiation factor 6  
736 selectively regulates Wnt signaling and beta-catenin protein synthesis. *Oncogene* 2008,  
737 **27**(6): 755-762.  
738  
739 45. Bolger AM, Lohse M, Usadel B. Trimmomatic: a flexible trimmer for Illumina sequence data.  
740 *Bioinformatics* 2014, **30**(15): 2114-2120.  
741  
742 46. Dobin A, Davis CA, Schlesinger F, Drenkow J, Zaleski C, Jha S, *et al.* STAR: ultrafast universal  
743 RNA-seq aligner. *Bioinformatics* 2013, **29**(1): 15-21.  
744  
745 47. Anders S, Pyl PT, Huber W. HTSeq--a Python framework to work with high-throughput  
746 sequencing data. *Bioinformatics* 2015, **31**(2): 166-169.  
747  
748 48. Love MI, Huber W, Anders S. Moderated estimation of fold change and dispersion for RNA-  
749 seq data with DESeq2. *Genome Biol* 2014, **15**(12): 550.  
750  
751 49. Xiong Q, Mukherjee S, Furey TS. GSASeqSP: a toolset for gene set association analysis of  
752 RNA-Seq data. *Sci Rep* 2014, **4**: 6347.  
753

- 754 50. Calamita P, Miluzio A, Russo A, Pesce E, Ricciardi S, Khanim F, *et al.* SBDS-Deficient Cells Have  
755 an Altered Homeostatic Equilibrium due to Translational Inefficiency Which Explains their  
756 Reduced Fitness and Provides a Logical Framework for Intervention. *PLoS Genet* 2017, **13**(1):  
757 e1006552.  
758
- 759 51. Cordero J, Jassim O, Bao S, Cagan R. A role for wingless in an early pupal cell death event  
760 that contributes to patterning the Drosophila eye. *Mech Dev* 2004, **121**(12): 1523-1530.  
761
- 762 52. Montrasio S, Mlodzik M, Fanto M. A new allele uncovers the role of echinus in the control of  
763 ommatidial rotation in the Drosophila eye. *Dev Dyn* 2007, **236**(10): 2936-2942.  
764  
765

## 766 FIGURES LEGENDS

767 **Figure 1. Increasing Delf6 levels in the developing eye results in a *rough* eye**  
768 **phenotype and in an increased translation. (a)** Stereomicroscope images of  
769 *GMRGAL4/+* and *GMR>Delf6* eyes, showing a noteworthy *rough* eye phenotype. **(b)**  
770 Representative western blot showing the levels of Delf6 expression in *GMRGAL4/+*  
771 and *GMR>Delf6* adult eyes. **(c)** Representative SEM images of *GMRGAL4/+* and  
772 *GMR>Delf6* adult eyes. Delf6 overexpressing eyes have a complete aberrant  
773 morphology, showing flattened ommatidia and randomly arranged bristles. Scale bar,  
774 in order, 10  $\mu$ m, 5  $\mu$ m, 2.5  $\mu$ m **(d)** Representative tangential sections of *GMRGAL4/+*  
775 and *GMR>Delf6* adult eyes indicating that photoreceptors are still present in  
776 overexpressing eyes, even if their arrangement is lost. Scale bar 10  $\mu$ m. **(e)** iRIA  
777 assay showing that overexpressed Delf6 is able to bind the 60S, therefore  
778 confirming its functionality. **(f)** Quantification of SUnSET assay using ImageJ  
779 software. Graph represents mean  $\pm$  SD. Statistic applied was *t-test*, paired, two tails.  
780 Experiments were performed at least three times. **(g)** Representative SUnSET assay  
781 performed using immunofluorescence experiment, indicating a two-fold increase in  
782 general translation when Delf6 was overexpressed in eye imaginal discs. Scale bar  
783 10  $\mu$ m  
784

785 **Figure 2. DelF6 overexpressing retinae preserve cell identity but show an**  
786 **aberrant morphology. (a)** Mid-pupal stage retinae (40h APF) stained for eIF6  
787 confirming protein overexpression. **(b)** Staining for ELAV (neuronal cells marker) and  
788 Cut (cone cells marker) showing that both neurons and cone cells preserve their  
789 identity. Noteworthy, neural and cone cells show an incorrect arrangement on the  
790 plane in association to increased DelF6 levels. **(c)** Choptin (intra-photoreceptor  
791 membranes marker) staining confirms the aberrant morphology of *GMR>DeIF6*  
792 retinae. Scale bar 10  $\mu$ m

793

794 **Figure 3. Apoptotic wave is delayed and increased when *deif6* gene dosage is**  
795 **increased. (a)** Mid-pupal stage retinae (40h APF) stained for the *Drosophila*  
796 caspase Dcp-1. *GMRGAL4/+* retinae show Dcp-1 positive cells, indicating that  
797 Programmed Cell Death (PCD) is ongoing at this developmental stage. On the  
798 contrary, *GMR>DeIF6* retinae do not show Dcp-1 positive cells, indicating a block in  
799 PCD. **(b)** Late-pupal stage (60h APF) retinae stained for the *Drosophila* caspase  
800 Dcp-1. *GMRGAL4/+* retinae show the absence of Dcp-1 positive cells, as expected  
801 (PCD already finished at this developmental stage). On the contrary, *GMR>DeIF6*  
802 retinae, show Dcp-1 positive cells, indicating a delay in PCD associated to more  
803 DelF6 levels. **(c)** Dcp-1 positive cells counts indicate an overall delay and increase in  
804 PCD when DelF6 gene dosage is increased during eye development. Graph  
805 represents mean  $\pm$  SD. Statistic applied was *t-test*, paired, two tails. Counts were  
806 performed on three independent experiments. Scale bar 10  $\mu$ m

807

808 **Figure 4. Cell number is altered during pupal stage upon DelF6 overexpression.**  
809 **(a)** Mid-pupal stage (40h APF) retinae stained for Armadillo, the *Drosophila*  $\beta$ -catenin



810 homologue, showing that when Delf6 is overexpressed there are extra-numerary  
811 cells (indicated as \*) around each ommatidium. **(b)** Late-pupal stage (60h APF)  
812 retinae stained for Armadillo, showing the loss of all cells around ommatidia upon  
813 Delf6 overexpression. Scale bar 10  $\mu$ m.

814

815 **Figure 5. Increasing *deif6* gene dosage only in cone cells results in a *rough***  
816 **eye phenotype, that is specifically due to increased apoptosis (a-b)**  
817 Overexpression of Delf6 only in cone cells results in *rough* eye phenotype. **(a)**  
818 Representative stereomicroscope images of *spaGAL4/+* and *spa>Delf6* eyes  
819 showing a *rough* eye phenotype. **(b)** Representative tangential sections of  
820 *spaGAL4/+* and *spa>Delf6* adult eyes showing disruption of the structure upon  
821 Delf6 overexpression in cone cells. **(c)** Mid-pupal stage (40h APF) retinae stained  
822 for eIF6 confirming that overexpression of Delf6 is restricted only to cone cells. **(d)**  
823 Late-pupal stage (60h APF) retinae of *spaGAL4/+* and *spa>Delf6* genotypes stained  
824 for Dcp-1 confirming the delayed and increased apoptosis already observed in  
825 *GMR>Delf6* flies. (c-d) Scale bar 10  $\mu$ m **(e-f)** Blocking apoptosis rescues the *rough*  
826 eye phenotype. **(e)** Representative stereomicroscope images of *GMR>Delf6; p35*  
827 and *GMR>Delf6* adult eyes. **(f)** Western blot showing eIF6 levels in *GMR>Delf6;*  
828 *p35* and *GMR>Delf6* eyes. For each genotype, the densitometric ratio (Delf6/ $\beta$ -  
829 actin) was analysed with ImageJ and reported.

830

831 **Figure 6. Developmental defects dependent on altered *deif6* gene dosage are**  
832 **not tissue specific. (a)** Adult wings overexpressing Delf6 have a completely  
833 aberrant phenotype, evidencing developmental defects. **(b)** SUnSET assay  
834 quantification of an immunofluorescence experiment, indicating again a two-fold

835 increase in general translation when DelF6 is overexpressed in wing discs. Graph  
836 represents mean  $\pm$  SD. Statistic applied was *t-test*, paired, two tails. The experiment  
837 was performed at least three times. **(c)** Representative SUnSET assay performed  
838 using immunofluorescence experiment, indicating again a two-fold increase in  
839 general translation when DelF6 is overexpressed in wing discs. For each genotype,  
840 two magnifications are compared: 63x (scale bar 50  $\mu$ m) and, in the small squares,  
841 252x (scale bar 10  $\mu$ m). **(d)** Apoptosis is increased in wing imaginal disc expressing  
842 more DelF6 levels. Wing discs stained for Dcp-1 and DelF6 in control flies  
843 (*MSGAL4/+*) and in flies overexpressing DelF6 (*MS>DeIF6*). In *MS>DeIF6* there is a  
844 striking increase in apoptotic events, compared to the control. Scale bar 50  $\mu$ m

845

846 **Figure 7. RNASeq analysis shows a reshaping of transcription, resulting in**  
847 **rRNA processing alteration and in a gene signature specific for the eye, that**  
848 **reveals a role of 20-HE in defective apoptosis. (a)** Venn Diagram indicating genes  
849 differentially expressed in *GMR>DeIF6* larval eye imaginal discs and *GMR>DeIF6*  
850 retinae respect to controls (*GMRGAL4/+*). **(b)** The Ecdysone Biosynthetic Pathway is  
851 strikingly shut off when DelF6 is upregulated. Heat Map representing absolute gene  
852 expression levels in *GMR>DeIF6* and *GMRGAL4/+* eye imaginal disc samples for  
853 the subset of gene sets involved in Ecdysone Biosynthesis by Gene Ontology  
854 analysis. **(c)** mRNAs involved in Programmed Cell Death and in Eye Differentiation  
855 are upregulated in *GMR>DeIF6* retinae. Heat Map representing absolute gene  
856 expression levels in *GMR>DeIF6* and *GMRGAL4/+* retinae samples for the subset of  
857 gene sets involved in Programmed Cell Death and Eye Differentiation by Gene  
858 Ontology Analysis. **(d)** High levels of DelF6 are associated to lower HDAC activity.  
859 Representative graph showing a lower HDACs activity in association to high DelF6

860 protein levels. The assay has been performed on total protein extracts from  
861 *GMRGAL4/+* and *GMR>DeIF6* adult heads. (e-f) 20-HE treatment partially rescue  
862 the *rough* eye phenotype and the delay in apoptosis in 40h APF retinae (e)  
863 Immunofluorescence images showing that 20-HE treatment (240 µg/mL in standard  
864 fly food) rescues the apoptotic delay observed in *GMR>DeIF6* 40h APF retinae. (f)  
865 Representative graph showing the *GMR>DeIF6* adult fly eye size with or without  
866 treatment with 20-HE. As indicated in the graph, the fly eye size is partially rescued  
867 when the hormone is added to the fly food. Graphs represent mean ± SD. Statistic  
868 applied was *t-test*, paired, two tails. Counts were performed on three independent  
869 experiments.

870

871 **Figure 8. Model for DeIF6 high levels-associated changes.** We demonstrated  
872 that increased levels of DeIF6 are associated to increased general translation,  
873 resulting in a transcription rewiring. RNASeq analysis confirms that altering *deif6*  
874 gene dosage modulates apoptosis during development and interestingly, reveals a  
875 shutdown of genes involved in 20-HydroxyEcdysone biosynthesis. In addition, we  
876 found an upregulation of genes related to chromatin organization.

877

878 **Figure S1. Strong alteration of *deif6* gene dosage is incompatible with life and**  
879 **is associated to increased general translation when overexpressed in**  
880 **mammalian cells. (a) *DeIF6*<sup>k13214</sup> mosaic analysis. (A-F) Wild type (Oregon R) wing**  
881 **margin and *deif6* mutant clones. (A and B) Wild type control anterior wing margin. (C**  
882 **and D) Wing margin clones induced in *Minute/DeIF6*<sup>k13214</sup> flies according the crosses**  
883 **outlined in Materials and Methods. (E and F) Mutant clones induced along the wing**  
884 **margin by using UAS-*Flp*; C96-GAL4; FRT *DeIF6*<sup>k13214</sup>/FRT *y+ pwn* flies. (D and F)**

885 Arrows and arrowheads indicate *pwn DeIF63214* homozygous mutant and  
886 heterozygous *Minute (M/pwn DeIF6<sup>k13214</sup>)* tissues, respectively. Asterisks denote *y*  
887 twin cells and the “^” highlights heterozygous wild type bristles. **(b)** Ectopic  
888 embryonic *deif6* phenotypes. (A-B) Embryonic cuticle preparations in *TubGAL4/+* (A)  
889 and *Tub>DeIF6* (B) evidencing that DeIF6 gain of function is embryonic lethal. **(c-e)**  
890 eIF6 overexpression results in translation increase in mammalian cells. **(c)**  
891 Representative western blot showing the levels of DeIF6 expression in empty vector-  
892 and eIF6-pcDNA3.1 transfected cells. **(d)** SUnSET assay quantification of FACS  
893 analysis performed on HEK293T cells showing the same increase in general  
894 translation observed in *Drosophila* eye imaginal discs. Graph represents mean  $\pm$  SD.  
895 Statistic applied was *t-test*, paired, two tails. The experiment was performed at least  
896 three times. **(e)** Dot plot of FACS analysis performed in HEK293T cells of  
897 overexpressing and control cells' populations.

898

899 **Figure S2. DeIF6 overexpressing eye imaginal discs preserve cell identity and**  
900 **morphology. (a)** *GMR>DeIF6* and *GMRGAL4/+* eye imaginal discs stained for eIF6  
901 confirm the protein overexpression. **(b)** *GMR>DeIF6* and *GMRGAL4/+* eye imaginal  
902 discs stained for ELAV (neuronal cells marker) and Cut (cone cells marker) show  
903 that both neurons and cone cells preserve their identities. **(c)** *GMR>DeIF6* and  
904 *GMRGAL4/+* eye imaginal discs stained for Rough (R2-R5 marker) show the same  
905 pattern in both genotypes. Scale bar 50  $\mu$ m.

906

907 **Figure S3. PCD is delayed when DeIF6 gene dosage is increased.** TUNEL assay  
908 on early (28h APF) **(a)** and mid-pupal (40h APF) stages **(b)** retinæ indicate that PCD

909 is blocked at these developmental stages when *DeIF6* is overexpressed. Scale bar  
910 50  $\mu\text{m}$ .

911

912 **Figure S4. Cell number is altered during pupal stage upon *DeIF6***  
913 **overexpression. (a)** Comparison of cells number across two genotypes,  
914 *GMRGAL4/+* and *GMR>DeIF6*, shows that there is an increase in *GMR>DeIF6*  
915 respect to control. ‘ $\Delta$  cells per ommatidium’ refers to the number of cells gained or  
916 lost within a ommatidia (number of cells in hexagon divided by 3). Results in the third  
917 column represent the mean  $\pm$  SD. **(b)** Late-pupal stage (72h APF) retinae stained for  
918 Armadillo, the *Drosophila*  $\beta$ -catenin homologue, showing that when *DeIF6* is  
919 overexpressed cells around ommatidia are lost. Scale bar 10  $\mu\text{m}$ .

920

921 **Figure S5. Increasing *DeIF6* gene dosage only in pigment cells or in cone cells**  
922 **results in a *rough* eye phenotype and in an aberrant morphology associated to**  
923 **a block in apoptosis (a)** Overexpression of *DeIF6* only in pigment cells results in  
924 *rough* eye phenotype. **(b)** Mid-pupal stage (40h APF) retinae of *spaGAL4/+* and  
925 *spa>DeIF6* genotypes stained for ELAV and CUT confirm that neural and cone cell  
926 identity is preserved, but morphology is not. **(c)** Mid-pupal stage (40h APF) retinae of  
927 *spaGAL4/+* and *spa>DeIF6* genotypes stained for Dcp-1 confirm the block in  
928 apoptosis already demonstrated in *GMR>DeIF6* flies. Scale bar 10  $\mu\text{m}$

929

930 **Figure S6. RNASeq analysis reveals an upregulation in genes belonging to**  
931 **ribosome biogenesis and chromosome organization gene sets and a strong**  
932 **downregulation of genes related to 20-HydroxyEcdysone biosynthesis. (a)**  
933 Gene Set Association Analysis (GSAA) indicates a significative upregulation of

934 ribosomal machinery. Representative Enrichment Plots indicating a striking  
935 upregulation of genes involved in rRNA Processing and Ribosome Biogenesis in  
936 both *GMR>DeIF6* eye imaginal discs and *GMR>DeIF6* retinae respect to their  
937 controls (*GMRGAL4/+*). **(b)** 20-HydroxyEcdysone biosynthetic pathway scheme.  
938 Genes involved in 20-HE biosynthesis are strongly downregulated in *GMR>DeIF6*  
939 eye imaginal disc, respect to control. **(c)** GSAA shows an upregulation of genes  
940 related to chromosome organization gene set in *GMR>DeIF6* eye imaginal disc,  
941 respect to control.

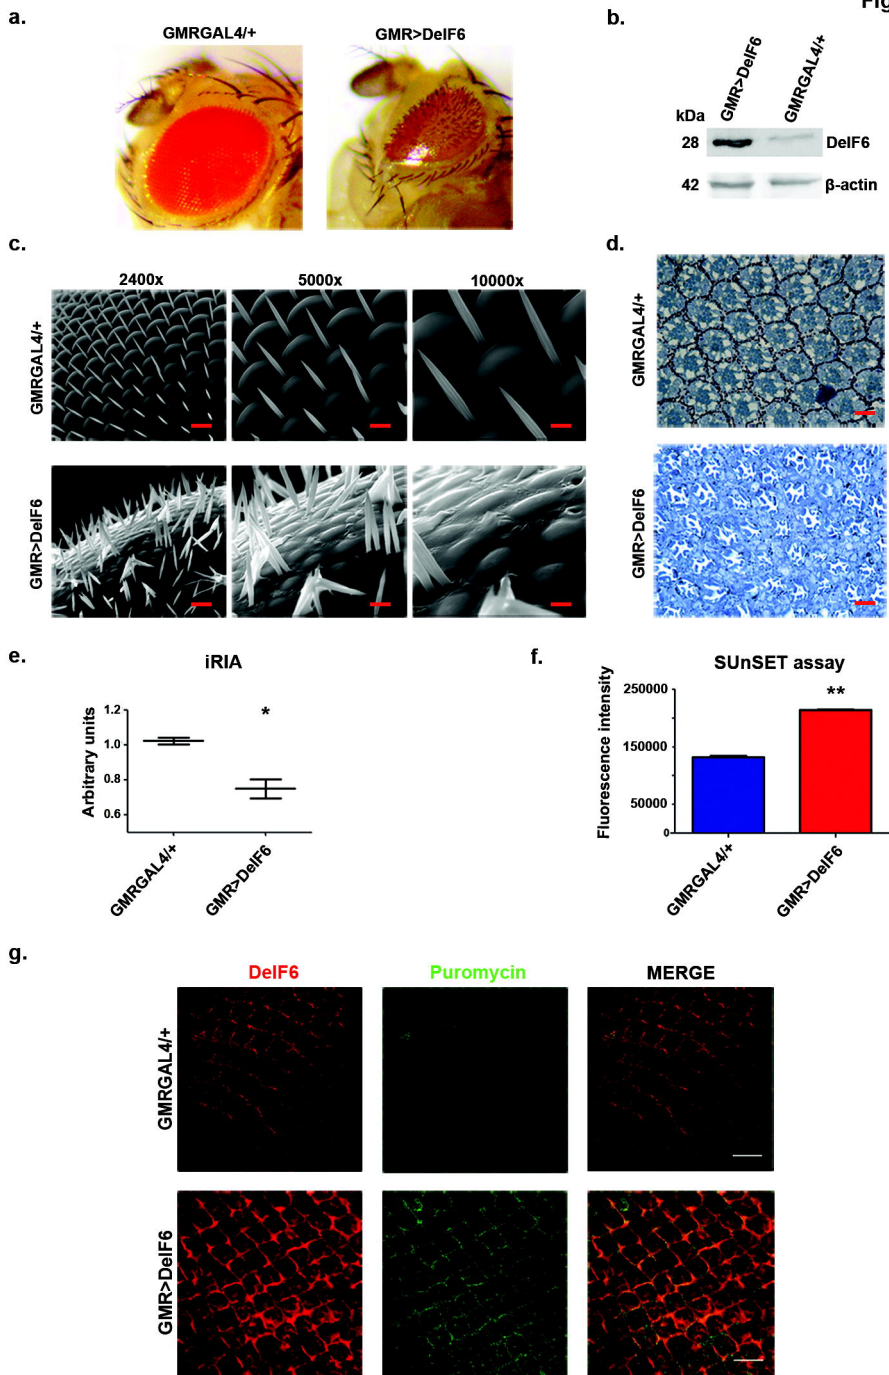

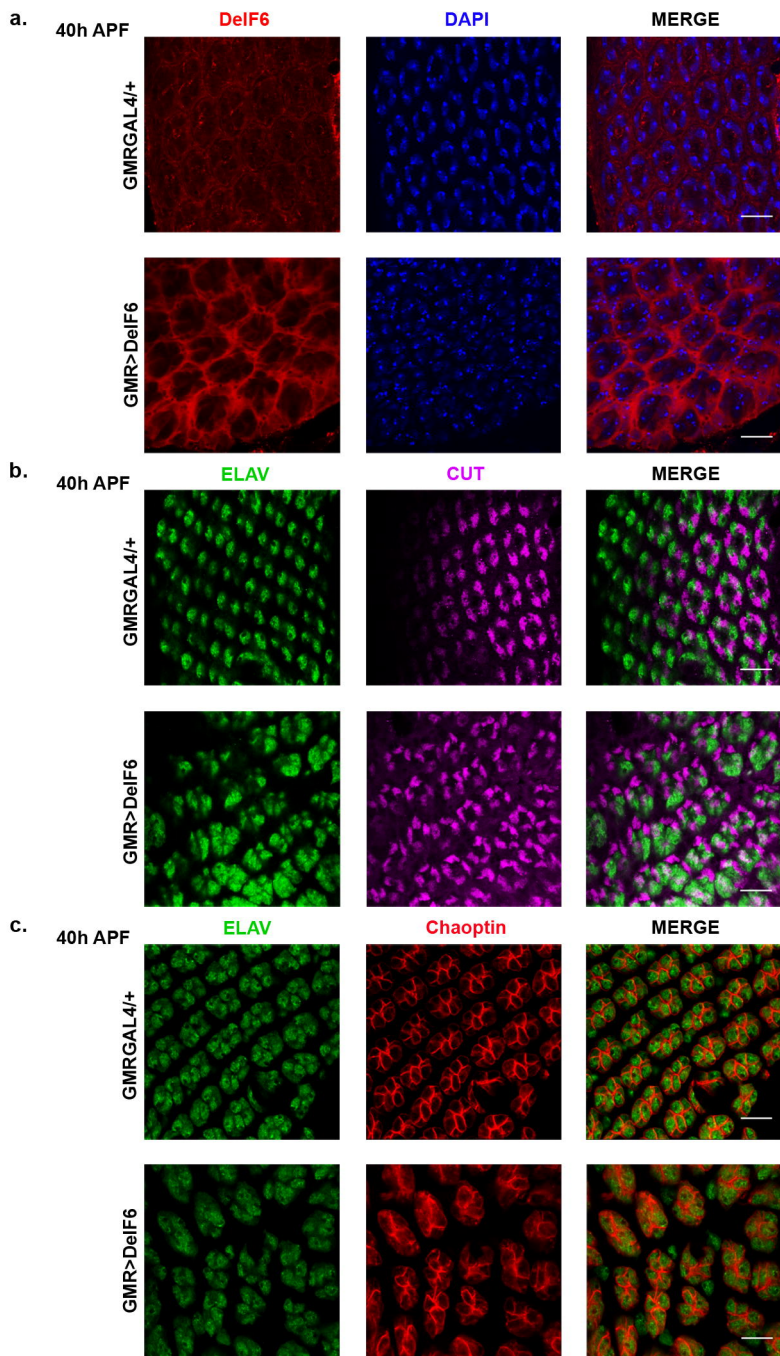

Fig. 2



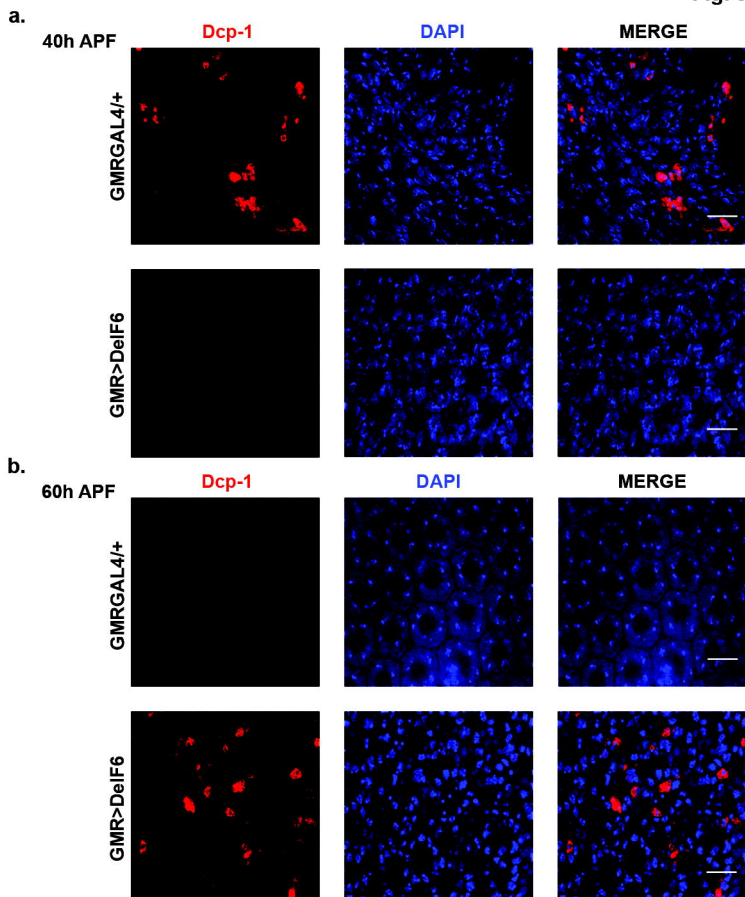

**c.**

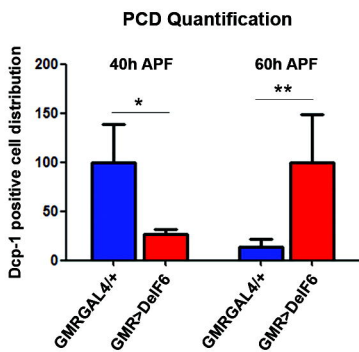

Fig. 4

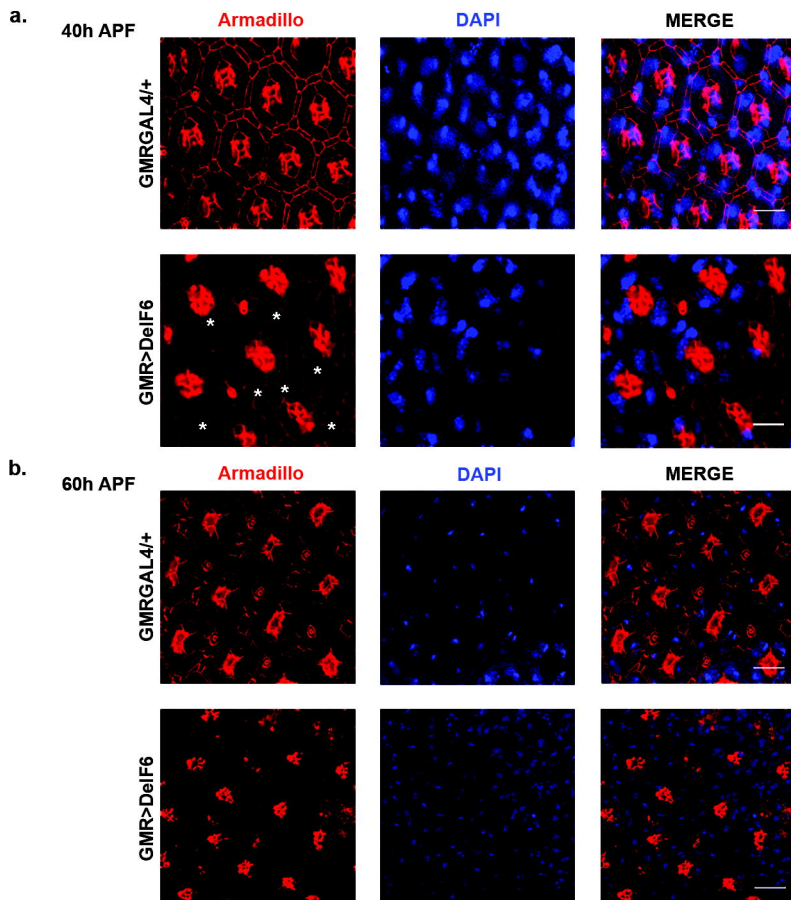

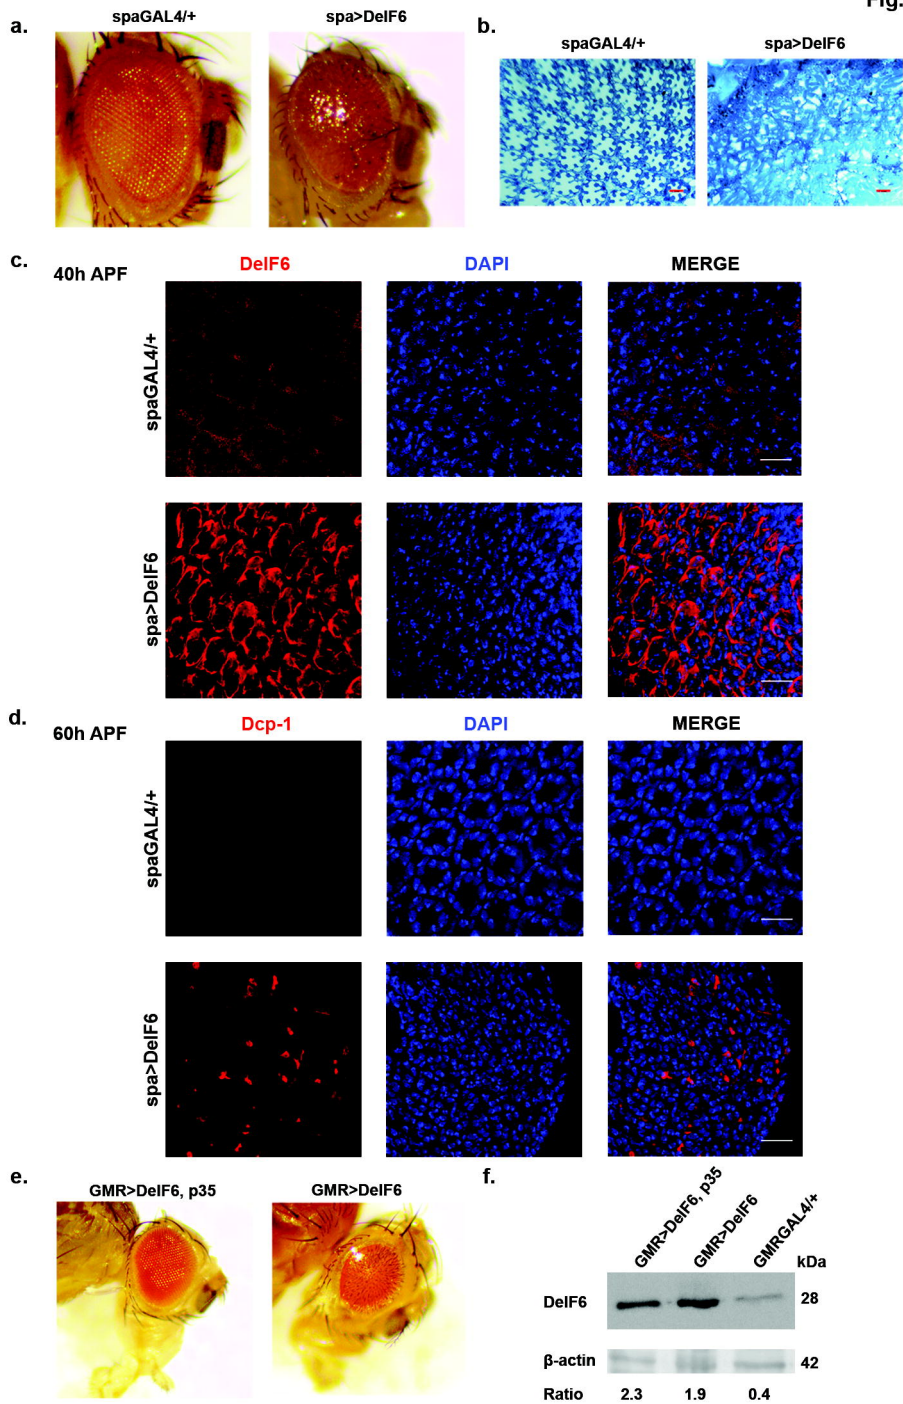

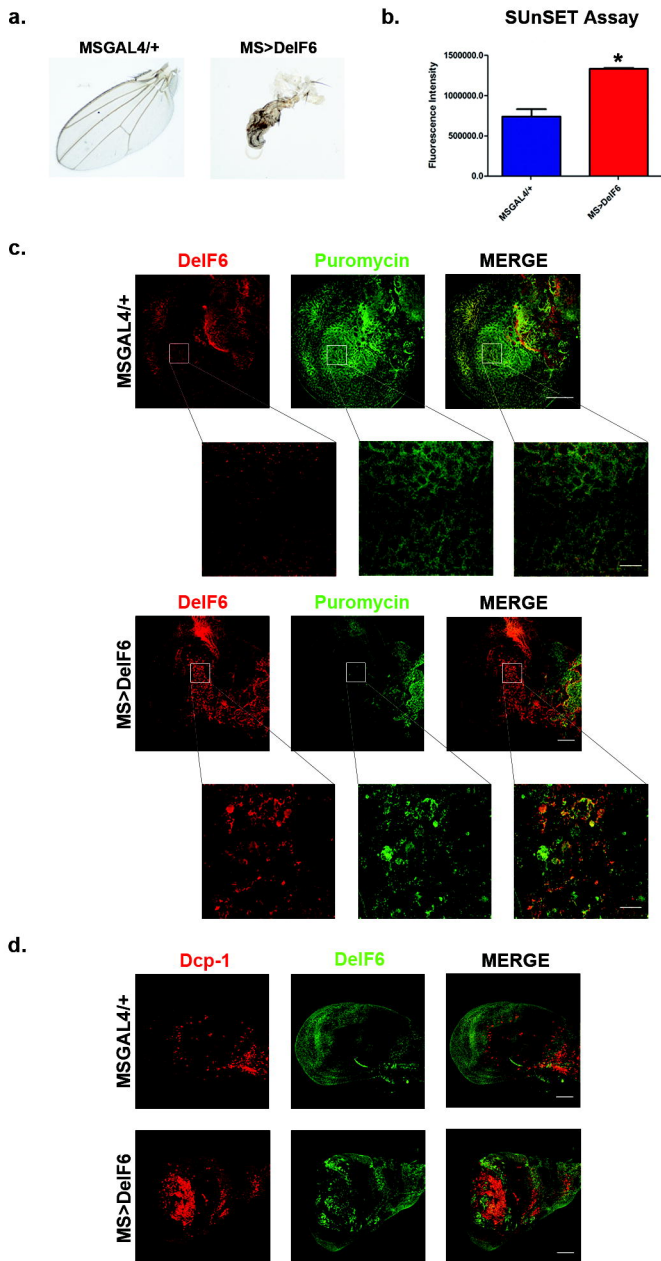

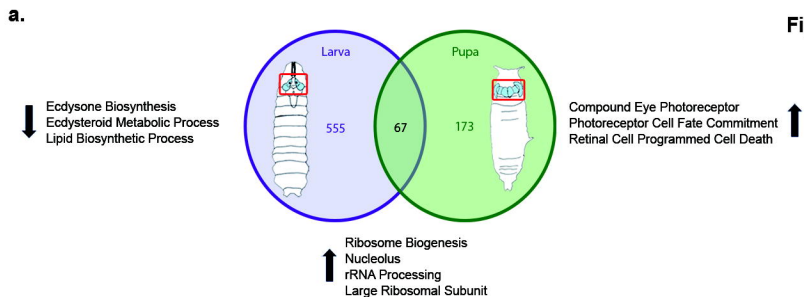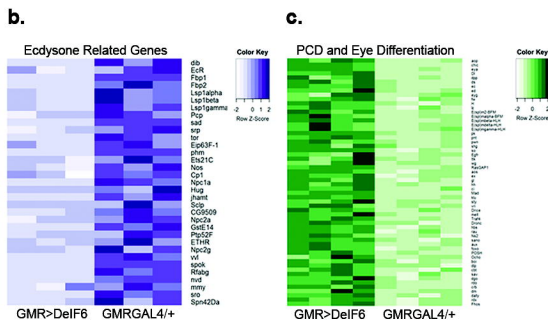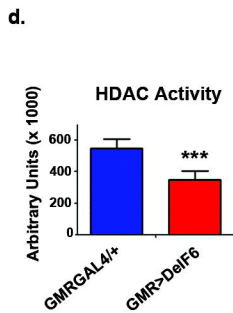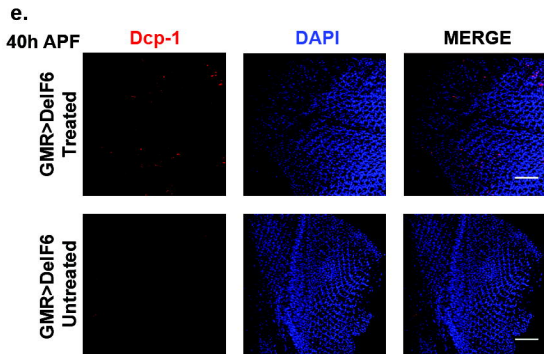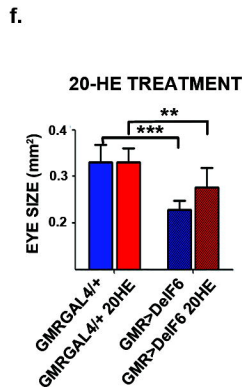

Fig. 8

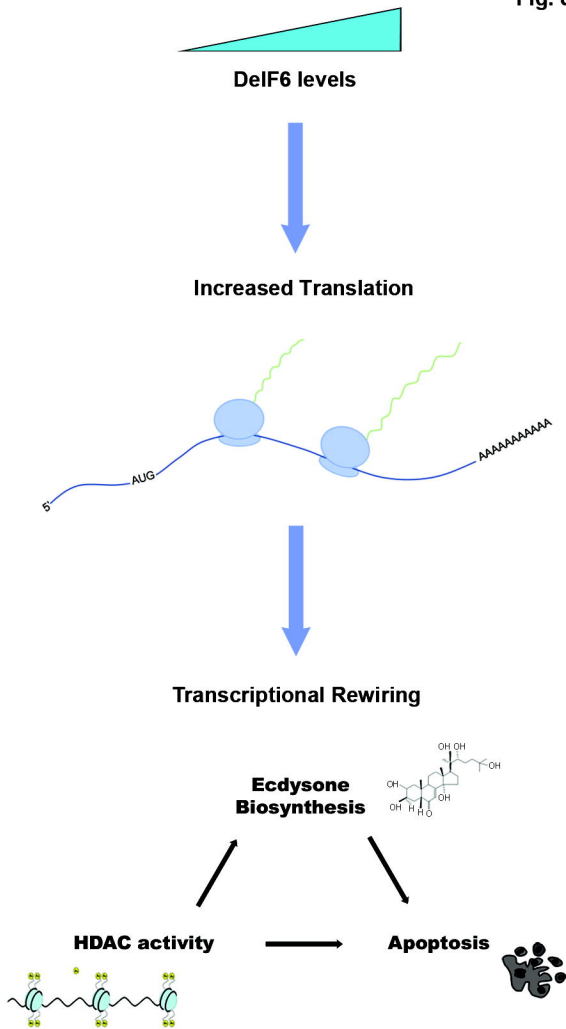

Source: https://www.biorxiv.org/content/10.1101/201558v1.full.pdf
